# Supplementary material
Source: ML conference proceedings conference paper supplement (https://proceedings.mlr.press/v80/cheng18a.html)
Supplement: Supplementary file [file cheng18a-supp.pdf]

## A. Proof

### A.1. Proof of Lemma 2

It is relatively hard to represent all  $\mathbf{x}_j - \mathbf{x}_k$ , so we define  $\tilde{X}$  to be an  $d \times c$  matrix, with  $c = C_2^m$ , and we use  $q$  to denote each possible  $(j, k)$  pairs (the  $q$ -th column of  $\tilde{X}$  is  $\mathbf{x}_j - \mathbf{x}_k$ ). For each observed comparison  $\alpha = 1, \dots, m$ , we use  $(i_\alpha, j_\alpha, k_\alpha)$  to denote the (task, item  $j$ , item  $k$ ) tuple,  $q_\alpha := (j_\alpha, k_\alpha)$  to denote the encoding of item pairs, and  $y_\alpha$  is the observed +1/-1 outcome. The problem can then be rewritten as

$$\min_{W \in \mathbb{R}^{T \times d}} \sum_{\alpha=1}^m \ell((W\tilde{X})_{i_\alpha, q_\alpha}, y_\alpha), \quad \text{such that } \|W\|_* \leq \mathcal{W} \quad (11)$$

First we rewrite  $\mathfrak{R}(F_W)$  as follows:

$$\begin{aligned} \mathfrak{R}(F_\Theta) &= \mathbb{E}_\sigma \left[ \sup_{f \in F_W} \frac{1}{m} \sum_{\alpha=1}^m \sigma_\alpha \ell(f(i_\alpha, j_\alpha, k_\alpha), y_\alpha) \right] \\ &= \mathbb{E}_\sigma \left[ \sup_{W: \|W\|_* \leq \mathcal{W}} \frac{1}{m} \sum_{(i,q)} \Gamma_{iq} \ell((W\tilde{X})_{i,q}, y_{i,q}) \right] \end{aligned}$$

Where  $\Gamma \in \mathbb{R}^{T \times c}$  with each entry  $\Gamma_{iq} = \sum_{\alpha: i_\alpha=i, q_\alpha=q} \sigma_\alpha$ . Now, using the same trick in (Shamir & Shalev-Shwartz, 2014), we can divide  $\Gamma$  based on the "hit-time" on entry  $(i, q)$  of  $\Omega$ , with some threshold  $p > 0$  (we will discuss the optimal choice of  $p$  later). Let  $h_{iq} = |\alpha : i_\alpha = i, q_\alpha = q|$ , and let  $A, B \in \mathbb{R}^{T \times c}$  be defined as:

$$A_{iq} = \begin{cases} \Gamma_{iq}, & \text{if } h_{iq} > p \\ 0, & \text{otherwise.} \end{cases} \quad B_{iq} = \begin{cases} 0, & \text{if } h_{iq} > p \\ \Gamma_{iq}, & \text{otherwise.} \end{cases}$$

Since  $\Gamma = A + B$ , we can rewrite  $\mathfrak{R}(F_W)$  as:

$$\begin{aligned} \mathfrak{R}(F_W) &= \mathbb{E}_\sigma \left[ \sup_{W: \|W\|_* \leq \mathcal{W}} \frac{1}{m} \sum_{(i,q)} A_{iq} \ell((W\tilde{X})_{i,q}, y_{i,q}) \right] \\ &+ \mathbb{E}_\sigma \left[ \sup_{W: \|W\|_* \leq \mathcal{W}} \frac{1}{m} \sum_{(i,q)} B_{iq} \ell((W\tilde{X})_{i,q}, y_{i,q}) \right] \end{aligned} \quad (12)$$

By Lemma 10 in (Shamir & Shalev-Shwartz, 2014), the first term of (12) can be upper bounded by:

$$\frac{\mathcal{B}}{m} \mathbb{E}_\sigma \left[ \sum_{(i,j)} |A_{ij}| \right] \leq \frac{\mathcal{B}}{\sqrt{p}}$$

Also, we can bound the second term in (12) by:

$$\begin{aligned} &\mathbb{E}_\sigma \left[ \sup_{W: \|W\|_* \leq \mathcal{W}} \frac{1}{m} \sum_{(i,q)} B_{iq} \ell((W\tilde{X})_{i,q}, y_{i,q}) \right] \\ &\leq \frac{L_\ell}{m} \mathbb{E}_\sigma \left[ \sup_{W: \|W\|_* \leq \mathcal{W}} \sum_{(i,j)} B_{ij} (W\tilde{X})_{i,q} \right] \\ &\leq \frac{L_\ell}{m} \mathbb{E}_\sigma \left[ \sup_{W: \|W\|_* \leq \mathcal{W}} \|B\|_2 \|W\tilde{X}\|_* \right] \quad (13) \\ &= \frac{L_\ell}{m} \|W\tilde{X}\|_* \mathbb{E}_\sigma [\|B\|_2] \\ &\leq \frac{2L_\ell}{m} \mathcal{W} \mathbb{E}_\sigma [\|B\|_2] \\ &\leq 4.4 \frac{L_\ell}{m} C \mathcal{W} \sqrt{p} (\sqrt{T} + \sqrt{c}). \end{aligned}$$

Note that the last inequality is using Lemma 11 in (Shamir & Shalev-Shwartz, 2014), where  $C$  is a universal constant used in their paper. Therefore, with  $p$  chosen to be  $m\mathcal{B}/(4.4L_\ell C \mathcal{W} (\sqrt{T} + \sqrt{c}))$ , we can get  $\mathfrak{R}(F_W)$  bounded by:

$$\mathbb{E}_\Omega [\mathfrak{R}(F_W)] \leq \sqrt{\frac{9L_\ell \mathcal{B} C \mathcal{W} (\sqrt{T} + \sqrt{c})}{m}}. \quad (14)$$

Also, we can bound  $\mathbb{E}_\Omega [\mathfrak{R}(F_W)]$  using another way:

$$\begin{aligned} \mathfrak{R}(F_W) &\leq \frac{L_\ell}{m} \mathbb{E}_\sigma \left[ \sup_{W: \|W\|_* \leq \mathcal{W}} \sum_{\alpha=1}^m \sigma_\alpha (W\tilde{X})_{i_\alpha, q_\alpha} \right] \\ &= L_\ell \mathbb{E}_\sigma \left[ \sup_{W: \|W\|_* \leq \mathcal{W}} \frac{1}{m} \sum_{\alpha=1}^m \sigma_\alpha \text{trace}(W\tilde{X}_{q_\alpha} I_{i_\alpha}^T) \right] \\ &\leq L_\ell \mathcal{W} \max_{q,i} \|\tilde{X}_q I_i^T\|_2 \sqrt{\frac{\log 2d}{m}} \\ &\leq 2L_\ell \mathcal{W} \sqrt{\frac{\log 2d}{m}} \end{aligned} \quad (15)$$

where we use the assumption that  $\|\mathbf{x}_j\| \leq 1$  for all  $j$  so  $\|\mathbf{x}_j - \mathbf{x}_k\| \leq 2$ . Therefore, Rademacher complexity can be upper bounded by:

$$\mathbb{E}_\Omega [\mathfrak{R}_{F_\Theta}] \leq \min \left\{ 2L_\ell \mathcal{W} \sqrt{\frac{\log 2d}{m}}, \sqrt{\frac{9L_\ell \mathcal{B} \mathcal{W} (\sqrt{T} + \sqrt{c})}{m}} \right\}, \quad (16)$$

which then implies our theorem statement since  $c \leq n^2$ .

### A.2. Proof of Theorem 1

Combining Lemma 2 and Lemma 1, we get

$$\begin{aligned} R_\ell(f) &\leq \hat{R}_\ell(f) + \mathcal{B} \sqrt{\frac{\log \frac{1}{\delta}}{2m}} \\ &+ \min \left\{ 4L_\ell \mathcal{W} \sqrt{\frac{\log 2d}{m}}, \sqrt{\frac{36L_\ell \mathcal{W} C \mathcal{B} (\sqrt{T} + \sqrt{c})}{m}} \right\}. \end{aligned}$$

Therefore

$$R_\ell(f) - R_\ell^* \leq (\hat{R}_\ell(f) - R_\ell^*) + \mathcal{B} \sqrt{\frac{\log \frac{1}{\delta}}{2m}} \\ + \min \left\{ 4L_\ell \mathcal{W} \sqrt{\frac{\log 2d}{m}}, \sqrt{\frac{36L_\ell \mathcal{W} C \mathcal{B} (\sqrt{T} + \sqrt{c})}{m}} \right\}.$$

Next we use the following lemma to bound the expected ranking loss.

**Lemma 5** (Consistency of Excess Risk (Bartlett et al., 2006)). *Let  $\ell$  be a convex surrogate loss function. Then there exists a strictly increasing function  $\Psi$ ,  $\Psi(0) = 0$ , such that for all measurable  $f$ :*

$$R(f) - R^* \leq \Psi(R_\ell(f) - R_\ell^*),$$

where  $R^* = \inf_f R(f)$  and  $R_\ell^* = \inf_f R_\ell(f)$ .

Using Lemma 5, and assume  $\Psi(\cdot)$  is  $L_\Psi$  is the Lipchitz constant of  $\Psi$  in the domain  $\{f : R_\ell(f^*) - R_\ell^*\}$  (which is always bounded in this case since we only consider  $f_W$  with  $\|W\|_* \leq \mathcal{W}$ ), we get

$$R(f^*) - R^* \leq L_\Psi (R_\ell(f^*) - R_\ell^*) \\ \leq L_\Psi \left( (\hat{R}_\ell(f) - R_\ell^*) + \mathcal{B} \sqrt{\frac{\log \frac{1}{\delta}}{2m}} \right) \\ + \min \left\{ 4L_\ell \mathcal{W} \sqrt{\frac{\log 2d}{m}}, \sqrt{\frac{36L_\ell \mathcal{W} C \mathcal{B} (\sqrt{T} + \sqrt{c})}{m}} \right\}$$

Which can be simplified to

$$R(f^*) - R^* = O(\hat{R}_\ell(f^*) - R_\ell^*) + O\left(\mathcal{B} \sqrt{\frac{\log(1/\delta)}{m}}\right) \\ + O\left(\frac{\mathcal{W} \log d + \sqrt{\mathcal{W} \mathcal{B} (\sqrt{T} + \sqrt{c})}}{\sqrt{m}}\right).$$

### A.3. Proof of Lemma 3

Under the conditions listed in the lemma, taking  $\hat{W} = W^*$  will result in zero empirical error, so

$$\hat{R}_\ell(f_{\hat{W}}) \leq \hat{R}_\ell(f_{W^*}) = 0.$$

Furthermore, under these conditions  $R_\ell^* = 0$ . Combining with Theorem 1 proves this lemma.

### A.4. Proof of Lemma 4

Since each task  $i = 1, \dots, T$  is just a standard rankSVM problem with L2 regularization, we can follow the standard derivation for Rademacher complexity. From (Kakade et al., 2009)), the complexity for using L2 regularization is

$$E_\Omega[\mathfrak{R}(F_W)] \leq w L_\ell \sqrt{\frac{1}{m/T}} = \sqrt{T} w L_\ell \sqrt{\frac{1}{m}}. \quad (17)$$

Assume there are  $m/T$  pairs, and then use Lemma 1 we get the following error bound:

$$R_\ell(f) \leq \hat{R}_\ell(f) + 2E_\Omega[\mathfrak{R}(F_W)] + \mathcal{B} \sqrt{\frac{T \log \frac{1}{\delta}}{2m}} \quad (18)$$

Combine with the Rademacher complexity proved in (17), we get

$$R_\ell(f) \leq \hat{R}_\ell(f) + 4L_\ell \sqrt{T} w \mathcal{X} \sqrt{\frac{\log 2d}{m}} + \mathcal{B} \sqrt{\frac{T \log \frac{1}{\delta}}{2m}}.$$

Therefore,

$$R_\ell(f) - R_\ell^* \leq (\hat{R}_\ell(f) - R_\ell^*) + 4L_\ell \sqrt{T} w \mathcal{X} \sqrt{\frac{\log 2d}{m}} + \mathcal{B} \sqrt{\frac{T \log \frac{1}{\delta}}{2m}}.$$

Use Lemma 5 we get

$$R_\ell(f^*) - R_\ell^* \leq L_\Psi \left( (\hat{R}_\ell(f) - R_\ell^*) + 4L_\ell \sqrt{T} w \mathcal{X} \sqrt{\frac{\log 2d}{m}} + \mathcal{B} \sqrt{\frac{T \log \frac{1}{\delta}}{2m}} \right).$$

Under the condition provided in the theorem, the first term in the right hand side becomes 0, and then using the big-O notation we can prove this theorem.
